# Supplementary material for: The head turn paradigm to assess auditory laterality in cats: influence of ear position and repeated sound presentation
Source: PeerJ. 2017 Oct 24;5:e3925. doi: 10.7717/peerj.3925 (PMC5659213; doi:10.7717/peerj.3925)
Supplement: Table S1 — Given are the subjects, the sex, the affect, the sequence number of each playback presentation (order: 1–50), the ear position prior to listening to the call and the head turn direction (NA, no head turn). [file peerj-05-3925-s002.xlsx]

## Sheet: Data
subjects	sex	affect	order	earposition	headturn
M1	MALE	LOW	1	LEFT	NA
M1	MALE	HIGH	2	RIGHT	NA
M1	MALE	LOW	3	RIGHT	NA
M1	MALE	HIGH	4	LEFT	NA
M1	MALE	HIGH	5	LEFT	NA
M1	MALE	LOW	6	LEFT	LEFT
M1	MALE	LOW	7	LEFT	RIGHT
M1	MALE	HIGH	8	STRAIGHT	RIGHT
M1	MALE	LOW	9	LEFT	RIGHT
M1	MALE	LOW	10	RIGHT	NA
M1	MALE	HIGH	11	STRAIGHT	NA
M1	MALE	HIGH	12	STRAIGHT	LEFT
M1	MALE	LOW	13	LEFT	NA
M1	MALE	LOW	14	LEFT	RIGHT
M1	MALE	HIGH	15	RIGHT	NA
M1	MALE	LOW	16	STRAIGHT	NA
M1	MALE	HIGH	17	STRAIGHT	NA
M1	MALE	LOW	18	LEFT	RIGHT
M1	MALE	HIGH	19	LEFT	RIGHT
M1	MALE	HIGH	20	LEFT	RIGHT
M1	MALE	LOW	21	RIGHT	NA
M1	MALE	LOW	22	LEFT	RIGHT
M1	MALE	HIGH	23	STRAIGHT	RIGHT
M1	MALE	HIGH	24	LEFT	NA
M1	MALE	LOW	25	STRAIGHT	NA
M1	MALE	LOW	26	RIGHT	NA
M1	MALE	HIGH	27	LEFT	NA
M1	MALE	LOW	28	RIGHT	RIGHT
M1	MALE	LOW	29	LEFT	RIGHT
M1	MALE	HIGH	30	LEFT	RIGHT
M1	MALE	HIGH	31	LEFT	RIGHT
M1	MALE	LOW	32	LEFT	NA
M1	MALE	LOW	33	RIGHT	RIGHT
M1	MALE	HIGH	34	LEFT	NA
M1	MALE	HIGH	35	LEFT	NA
M1	MALE	LOW	36	LEFT	NA
M1	MALE	HIGH	37	LEFT	NA
M1	MALE	LOW	38	LEFT	NA
M1	MALE	LOW	39	LEFT	NA
M1	MALE	HIGH	40	LEFT	NA
M1	MALE	HIGH	41	LEFT	NA
M1	MALE	LOW	42	LEFT	NA
M1	MALE	HIGH	43	LEFT	NA
M1	MALE	LOW	44	LEFT	NA
M1	MALE	HIGH	45	LEFT	NA
M1	MALE	HIGH	46	LEFT	NA
M1	MALE	LOW	47	LEFT	NA
M1	MALE	LOW	48	LEFT	NA
M1	MALE	HIGH	49	LEFT	LEFT
M1	MALE	HIGH	50	LEFT	LEFT
M2	MALE	LOW	1	LEFT	RIGHT
M2	MALE	HIGH	2	LEFT	LEFT
M2	MALE	HIGH	3	RIGHT	RIGHT
M2	MALE	LOW	4	LEFT	NA
M2	MALE	LOW	5	LEFT	NA
M2	MALE	HIGH	6	RIGHT	NA
M2	MALE	HIGH	7	LEFT	RIGHT
M2	MALE	LOW	8	RIGHT	NA
M2	MALE	HIGH	9	STRAIGHT	NA
M2	MALE	HIGH	10	RIGHT	NA
M2	MALE	LOW	11	LEFT	RIGHT
M2	MALE	LOW	12	RIGHT	RIGHT
M2	MALE	HIGH	13	RIGHT	NA
M2	MALE	HIGH	14	RIGHT	NA
M2	MALE	LOW	15	RIGHT	RIGHT
M2	MALE	LOW	16	RIGHT	NA
M2	MALE	HIGH	17	LEFT	NA
M2	MALE	HIGH	18	LEFT	NA
M2	MALE	LOW	19	RIGHT	NA
M2	MALE	HIGH	20	RIGHT	NA
M2	MALE	HIGH	21	RIGHT	NA
M2	MALE	LOW	22	RIGHT	NA
M2	MALE	LOW	23	RIGHT	NA
M2	MALE	HIGH	24	RIGHT	NA
M2	MALE	HIGH	25	STRAIGHT	RIGHT
M2	MALE	LOW	26	LEFT	RIGHT
M2	MALE	LOW	27	RIGHT	NA
M2	MALE	HIGH	28	RIGHT	NA
M2	MALE	LOW	29	LEFT	LEFT
M2	MALE	HIGH	30	RIGHT	NA
M2	MALE	LOW	31	RIGHT	NA
M2	MALE	HIGH	32	LEFT	NA
M2	MALE	HIGH	33	LEFT	RIGHT
M2	MALE	LOW	34	LEFT	NA
M2	MALE	LOW	35	RIGHT	NA
M2	MALE	HIGH	36	RIGHT	LEFT
M2	MALE	LOW	37	LEFT	RIGHT
M2	MALE	LOW	38	RIGHT	NA
M2	MALE	HIGH	39	RIGHT	NA
M2	MALE	LOW	40	RIGHT	NA
M2	MALE	LOW	41	RIGHT	NA
M2	MALE	HIGH	42	RIGHT	NA
M2	MALE	HIGH	43	STRAIGHT	LEFT
M2	MALE	LOW	44	LEFT	LEFT
M2	MALE	LOW	45	LEFT	RIGHT
M2	MALE	HIGH	46	STRAIGHT	RIGHT
M2	MALE	LOW	47	RIGHT	NA
M2	MALE	LOW	48	LEFT	NA
M2	MALE	HIGH	49	LEFT	NA
M2	MALE	HIGH	50	RIGHT	RIGHT
M3	MALE	HIGH	1	LEFT	LEFT
M3	MALE	LOW	2	STRAIGHT	LEFT
M3	MALE	LOW	3	STRAIGHT	RIGHT
M3	MALE	LOW	4	RIGHT	LEFT
M3	MALE	HIGH	5	LEFT	LEFT
M3	MALE	LOW	6	RIGHT	RIGHT
M3	MALE	HIGH	7	STRAIGHT	RIGHT
M3	MALE	HIGH	8	RIGHT	RIGHT
M3	MALE	LOW	9	LEFT	NA
M3	MALE	LOW	10	LEFT	NA
M3	MALE	HIGH	11	LEFT	NA
M3	MALE	HIGH	12	LEFT	NA
M3	MALE	LOW	13	LEFT	NA
M3	MALE	LOW	14	LEFT	NA
M3	MALE	HIGH	15	LEFT	NA
M3	MALE	LOW	16	LEFT	NA
M3	MALE	LOW	17	LEFT	NA
M3	MALE	LOW	18	LEFT	NA
M3	MALE	LOW	19	STRAIGHT	NA
M3	MALE	HIGH	20	LEFT	NA
M3	MALE	LOW	21	LEFT	NA
M3	MALE	HIGH	22	LEFT	LEFT
M3	MALE	LOW	23	LEFT	NA
M3	MALE	LOW	24	LEFT	NA
M3	MALE	HIGH	25	LEFT	NA
M3	MALE	LOW	26	LEFT	NA
M3	MALE	HIGH	27	LEFT	NA
M3	MALE	LOW	28	STRAIGHT	NA
M3	MALE	HIGH	29	RIGHT	NA
M3	MALE	LOW	30	LEFT	NA
M3	MALE	LOW	31	LEFT	NA
M3	MALE	HIGH	32	LEFT	NA
M3	MALE	HIGH	33	RIGHT	RIGHT
M3	MALE	LOW	34	RIGHT	NA
M3	MALE	LOW	35	STRAIGHT	NA
M3	MALE	HIGH	36	LEFT	NA
M3	MALE	HIGH	37	LEFT	NA
M3	MALE	LOW	38	LEFT	NA
M3	MALE	LOW	39	RIGHT	NA
M3	MALE	HIGH	40	LEFT	NA
M3	MALE	HIGH	41	RIGHT	RIGHT
M3	MALE	HIGH	42	LEFT	NA
M3	MALE	LOW	43	LEFT	NA
M3	MALE	HIGH	44	RIGHT	NA
M3	MALE	HIGH	45	RIGHT	NA
M3	MALE	LOW	46	LEFT	NA
M3	MALE	HIGH	47	LEFT	NA
M3	MALE	HIGH	48	RIGHT	NA
M3	MALE	HIGH	49	RIGHT	NA
M3	MALE	HIGH	50	LEFT	NA
M4	MALE	LOW	1	STRAIGHT	RIGHT
M4	MALE	HIGH	2	LEFT	LEFT
M4	MALE	LOW	3	LEFT	LEFT
M4	MALE	HIGH	4	LEFT	NA
M4	MALE	LOW	5	RIGHT	RIGHT
M4	MALE	LOW	6	LEFT	LEFT
M4	MALE	LOW	7	STRAIGHT	RIGHT
M4	MALE	HIGH	8	LEFT	NA
M4	MALE	HIGH	9	RIGHT	RIGHT
M4	MALE	LOW	10	RIGHT	NA
M4	MALE	LOW	11	RIGHT	RIGHT
M4	MALE	HIGH	12	RIGHT	RIGHT
M4	MALE	HIGH	13	RIGHT	NA
M4	MALE	LOW	14	RIGHT	RIGHT
M4	MALE	LOW	15	LEFT	LEFT
M4	MALE	LOW	16	STRAIGHT	RIGHT
M4	MALE	LOW	17	RIGHT	RIGHT
M4	MALE	HIGH	18	STRAIGHT	NA
M4	MALE	LOW	19	RIGHT	NA
M4	MALE	LOW	20	LEFT	NA
M4	MALE	HIGH	21	LEFT	NA
M4	MALE	HIGH	22	RIGHT	NA
M4	MALE	LOW	23	LEFT	RIGHT
M4	MALE	LOW	24	STRAIGHT	NA
M4	MALE	HIGH	25	RIGHT	RIGHT
M4	MALE	HIGH	26	LEFT	RIGHT
M4	MALE	LOW	27	LEFT	RIGHT
M4	MALE	LOW	28	LEFT	NA
M4	MALE	HIGH	29	RIGHT	NA
M4	MALE	HIGH	30	LEFT	NA
M4	MALE	LOW	31	LEFT	NA
M4	MALE	HIGH	32	STRAIGHT	NA
M4	MALE	LOW	33	LEFT	NA
M4	MALE	HIGH	34	LEFT	NA
M4	MALE	HIGH	35	LEFT	RIGHT
M4	MALE	LOW	36	LEFT	NA
M4	MALE	LOW	37	RIGHT	NA
M4	MALE	HIGH	38	LEFT	LEFT
M4	MALE	LOW	39	STRAIGHT	NA
M4	MALE	LOW	40	LEFT	NA
M4	MALE	HIGH	41	RIGHT	RIGHT
M4	MALE	HIGH	42	LEFT	NA
M4	MALE	LOW	43	RIGHT	NA
M4	MALE	LOW	44	LEFT	LEFT
M4	MALE	HIGH	45	LEFT	RIGHT
M4	MALE	HIGH	46	LEFT	LEFT
M4	MALE	HIGH	47	STRAIGHT	LEFT
M4	MALE	HIGH	48	RIGHT	NA
M4	MALE	HIGH	49	LEFT	NA
M4	MALE	HIGH	50	RIGHT	RIGHT
M5	MALE	HIGH	1	LEFT	LEFT
M5	MALE	LOW	2	LEFT	LEFT
M5	MALE	LOW	3	LEFT	NA
M5	MALE	HIGH	4	LEFT	NA
M5	MALE	HIGH	5	STRAIGHT	RIGHT
M5	MALE	LOW	6	RIGHT	NA
M5	MALE	LOW	7	LEFT	NA
M5	MALE	HIGH	8	RIGHT	NA
M5	MALE	LOW	9	LEFT	NA
M5	MALE	HIGH	10	RIGHT	NA
M5	MALE	HIGH	11	LEFT	NA
M5	MALE	LOW	12	LEFT	LEFT
M5	MALE	LOW	13	LEFT	NA
M5	MALE	HIGH	14	RIGHT	NA
M5	MALE	LOW	15	RIGHT	LEFT
M5	MALE	HIGH	16	RIGHT	NA
M5	MALE	HIGH	17	RIGHT	NA
M5	MALE	LOW	18	RIGHT	NA
M5	MALE	LOW	19	RIGHT	NA
M5	MALE	HIGH	20	RIGHT	NA
M5	MALE	LOW	21	RIGHT	NA
M5	MALE	LOW	22	LEFT	LEFT
M5	MALE	HIGH	23	RIGHT	NA
M5	MALE	HIGH	24	RIGHT	NA
M5	MALE	LOW	25	RIGHT	LEFT
M5	MALE	HIGH	26	RIGHT	NA
M5	MALE	HIGH	27	LEFT	NA
M5	MALE	LOW	28	LEFT	NA
M5	MALE	HIGH	29	LEFT	NA
M5	MALE	HIGH	30	STRAIGHT	RIGHT
M5	MALE	LOW	31	RIGHT	NA
M5	MALE	LOW	32	RIGHT	NA
M5	MALE	HIGH	33	RIGHT	NA
M5	MALE	HIGH	34	LEFT	LEFT
M5	MALE	LOW	35	STRAIGHT	RIGHT
M5	MALE	LOW	36	LEFT	RIGHT
M5	MALE	HIGH	37	LEFT	NA
M5	MALE	HIGH	38	LEFT	NA
M5	MALE	LOW	39	LEFT	NA
M5	MALE	LOW	40	STRAIGHT	LEFT
M5	MALE	HIGH	41	LEFT	LEFT
M5	MALE	HIGH	42	LEFT	NA
M5	MALE	LOW	43	LEFT	NA
M5	MALE	LOW	44	RIGHT	NA
M5	MALE	HIGH	45	STRAIGHT	NA
M5	MALE	LOW	46	STRAIGHT	NA
M5	MALE	LOW	47	RIGHT	NA
M5	MALE	HIGH	48	RIGHT	NA
M5	MALE	LOW	49	RIGHT	RIGHT
M5	MALE	HIGH	50	RIGHT	RIGHT
M6	MALE	HIGH	1	LEFT	LEFT
M6	MALE	LOW	2	RIGHT	NA
M6	MALE	HIGH	3	STRAIGHT	LEFT
M6	MALE	HIGH	4	STRAIGHT	NA
M6	MALE	LOW	5	RIGHT	NA
M6	MALE	HIGH	6	RIGHT	NA
M6	MALE	HIGH	7	RIGHT	NA
M6	MALE	LOW	8	LEFT	NA
M6	MALE	HIGH	9	RIGHT	RIGHT
M6	MALE	HIGH	10	RIGHT	RIGHT
M6	MALE	HIGH	11	LEFT	NA
M6	MALE	LOW	12	RIGHT	NA
M6	MALE	LOW	13	RIGHT	NA
M6	MALE	HIGH	14	RIGHT	NA
M6	MALE	HIGH	15	RIGHT	RIGHT
M6	MALE	LOW	16	LEFT	NA
M6	MALE	LOW	17	RIGHT	NA
M6	MALE	HIGH	18	LEFT	LEFT
M6	MALE	HIGH	19	STRAIGHT	NA
M6	MALE	LOW	20	RIGHT	NA
M6	MALE	HIGH	21	STRAIGHT	NA
M6	MALE	HIGH	22	RIGHT	RIGHT
M6	MALE	LOW	23	LEFT	NA
M6	MALE	LOW	24	STRAIGHT	NA
M6	MALE	HIGH	25	LEFT	LEFT
M6	MALE	LOW	26	STRAIGHT	RIGHT
M6	MALE	LOW	27	RIGHT	RIGHT
M6	MALE	LOW	28	STRAIGHT	LEFT
M6	MALE	HIGH	29	RIGHT	NA
M6	MALE	HIGH	30	RIGHT	NA
M6	MALE	LOW	31	LEFT	NA
M6	MALE	LOW	32	RIGHT	LEFT
M6	MALE	HIGH	33	RIGHT	LEFT
M6	MALE	LOW	34	RIGHT	NA
M6	MALE	LOW	35	LEFT	NA
M6	MALE	LOW	36	RIGHT	NA
M6	MALE	HIGH	37	RIGHT	NA
M6	MALE	HIGH	38	LEFT	NA
M6	MALE	LOW	39	LEFT	NA
M6	MALE	HIGH	40	RIGHT	NA
M6	MALE	LOW	41	LEFT	NA
M6	MALE	LOW	42	LEFT	NA
M6	MALE	HIGH	43	RIGHT	NA
M6	MALE	HIGH	44	RIGHT	RIGHT
M6	MALE	LOW	45	LEFT	NA
M6	MALE	LOW	46	RIGHT	NA
M6	MALE	HIGH	47	LEFT	RIGHT
M6	MALE	LOW	48	LEFT	RIGHT
M6	MALE	HIGH	49	LEFT	NA
M6	MALE	LOW	50	LEFT	NA
M7	MALE	HIGH	1	LEFT	LEFT
M7	MALE	LOW	2	RIGHT	NA
M7	MALE	HIGH	3	STRAIGHT	LEFT
M7	MALE	HIGH	4	LEFT	NA
M7	MALE	LOW	5	LEFT	NA
M7	MALE	LOW	6	LEFT	NA
M7	MALE	HIGH	7	RIGHT	NA
M7	MALE	HIGH	8	LEFT	NA
M7	MALE	HIGH	9	RIGHT	NA
M7	MALE	HIGH	10	RIGHT	LEFT
M7	MALE	LOW	11	LEFT	NA
M7	MALE	LOW	12	STRAIGHT	RIGHT
M7	MALE	HIGH	13	RIGHT	NA
M7	MALE	HIGH	14	STRAIGHT	NA
M7	MALE	LOW	15	RIGHT	NA
M7	MALE	LOW	16	LEFT	RIGHT
M7	MALE	HIGH	17	STRAIGHT	NA
M7	MALE	HIGH	18	RIGHT	NA
M7	MALE	LOW	19	RIGHT	LEFT
M7	MALE	LOW	20	STRAIGHT	LEFT
M7	MALE	HIGH	21	LEFT	LEFT
M7	MALE	HIGH	22	RIGHT	NA
M7	MALE	LOW	23	RIGHT	NA
M7	MALE	LOW	24	RIGHT	NA
M7	MALE	HIGH	25	LEFT	NA
M7	MALE	HIGH	26	RIGHT	NA
M7	MALE	LOW	27	RIGHT	RIGHT
M7	MALE	LOW	28	LEFT	RIGHT
M7	MALE	HIGH	29	STRAIGHT	LEFT
M7	MALE	HIGH	30	LEFT	NA
M7	MALE	LOW	31	LEFT	LEFT
M7	MALE	HIGH	32	LEFT	NA
M7	MALE	HIGH	33	RIGHT	RIGHT
M7	MALE	LOW	34	LEFT	NA
M7	MALE	LOW	35	STRAIGHT	NA
M7	MALE	HIGH	36	STRAIGHT	RIGHT
M7	MALE	HIGH	37	RIGHT	NA
M7	MALE	LOW	38	LEFT	NA
M7	MALE	HIGH	39	LEFT	NA
M7	MALE	LOW	40	RIGHT	NA
M7	MALE	LOW	41	RIGHT	NA
M7	MALE	HIGH	42	LEFT	RIGHT
M7	MALE	LOW	43	STRAIGHT	NA
M7	MALE	LOW	44	RIGHT	NA
M7	MALE	HIGH	45	LEFT	NA
M7	MALE	LOW	46	RIGHT	NA
M7	MALE	HIGH	47	STRAIGHT	RIGHT
M7	MALE	LOW	48	LEFT	NA
M7	MALE	LOW	49	LEFT	NA
M7	MALE	LOW	50	LEFT	LEFT
M8	MALE	HIGH	1	LEFT	LEFT
M8	MALE	LOW	2	RIGHT	RIGHT
M8	MALE	LOW	3	LEFT	LEFT
M8	MALE	HIGH	4	LEFT	LEFT
M8	MALE	HIGH	5	STRAIGHT	NA
M8	MALE	LOW	6	RIGHT	LEFT
M8	MALE	LOW	7	RIGHT	LEFT
M8	MALE	HIGH	8	LEFT	LEFT
M8	MALE	LOW	9	RIGHT	RIGHT
M8	MALE	LOW	10	STRAIGHT	NA
M8	MALE	HIGH	11	RIGHT	RIGHT
M8	MALE	HIGH	12	LEFT	NA
M8	MALE	HIGH	13	LEFT	LEFT
M8	MALE	HIGH	14	RIGHT	NA
M8	MALE	LOW	15	LEFT	RIGHT
M8	MALE	LOW	16	LEFT	RIGHT
M8	MALE	HIGH	17	LEFT	LEFT
M8	MALE	HIGH	18	LEFT	NA
M8	MALE	LOW	19	LEFT	LEFT
M8	MALE	LOW	20	LEFT	NA
M8	MALE	HIGH	21	STRAIGHT	RIGHT
M8	MALE	HIGH	22	LEFT	NA
M8	MALE	LOW	23	RIGHT	NA
M8	MALE	LOW	24	LEFT	LEFT
M8	MALE	HIGH	25	LEFT	NA
M8	MALE	HIGH	26	STRAIGHT	NA
M8	MALE	LOW	27	LEFT	LEFT
M8	MALE	LOW	28	RIGHT	RIGHT
M8	MALE	HIGH	29	LEFT	NA
M8	MALE	HIGH	30	LEFT	NA
M8	MALE	LOW	31	LEFT	LEFT
M8	MALE	LOW	32	LEFT	LEFT
M8	MALE	HIGH	33	RIGHT	NA
M8	MALE	HIGH	34	LEFT	RIGHT
M8	MALE	LOW	35	LEFT	RIGHT
M8	MALE	LOW	36	LEFT	NA
M8	MALE	HIGH	37	RIGHT	RIGHT
M8	MALE	HIGH	38	STRAIGHT	NA
M8	MALE	LOW	39	LEFT	LEFT
M8	MALE	LOW	40	STRAIGHT	NA
M8	MALE	HIGH	41	LEFT	NA
M8	MALE	HIGH	42	LEFT	RIGHT
M8	MALE	LOW	43	RIGHT	RIGHT
M8	MALE	LOW	44	LEFT	LEFT
M8	MALE	HIGH	45	STRAIGHT	RIGHT
M8	MALE	HIGH	46	LEFT	LEFT
M8	MALE	LOW	47	LEFT	LEFT
M8	MALE	LOW	48	LEFT	RIGHT
M8	MALE	HIGH	49	RIGHT	NA
M8	MALE	LOW	50	RIGHT	RIGHT
F1	FEMALE	LOW	1	LEFT	LEFT
F1	FEMALE	HIGH	2	LEFT	LEFT
F1	FEMALE	HIGH	3	LEFT	RIGHT
F1	FEMALE	LOW	4	STRAIGHT	LEFT
F1	FEMALE	HIGH	5	RIGHT	LEFT
F1	FEMALE	LOW	6	LEFT	NA
F1	FEMALE	HIGH	7	LEFT	LEFT
F1	FEMALE	HIGH	8	LEFT	LEFT
F1	FEMALE	LOW	9	RIGHT	LEFT
F1	FEMALE	LOW	10	LEFT	NA
F1	FEMALE	HIGH	11	LEFT	NA
F1	FEMALE	LOW	12	LEFT	NA
F1	FEMALE	HIGH	13	LEFT	NA
F1	FEMALE	LOW	14	LEFT	NA
F1	FEMALE	LOW	15	LEFT	NA
F1	FEMALE	HIGH	16	LEFT	NA
F1	FEMALE	LOW	17	LEFT	RIGHT
F1	FEMALE	HIGH	18	RIGHT	NA
F1	FEMALE	HIGH	19	LEFT	NA
F1	FEMALE	LOW	20	LEFT	RIGHT
F1	FEMALE	HIGH	21	RIGHT	NA
F1	FEMALE	LOW	22	LEFT	RIGHT
F1	FEMALE	HIGH	23	RIGHT	NA
F1	FEMALE	HIGH	24	LEFT	RIGHT
F1	FEMALE	HIGH	25	STRAIGHT	RIGHT
F1	FEMALE	LOW	26	LEFT	NA
F1	FEMALE	HIGH	27	STRAIGHT	NA
F1	FEMALE	HIGH	28	LEFT	LEFT
F1	FEMALE	LOW	29	LEFT	NA
F1	FEMALE	LOW	30	LEFT	LEFT
F1	FEMALE	HIGH	31	STRAIGHT	NA
F1	FEMALE	HIGH	32	LEFT	NA
F1	FEMALE	HIGH	33	LEFT	LEFT
F1	FEMALE	LOW	34	LEFT	RIGHT
F1	FEMALE	LOW	35	LEFT	NA
F1	FEMALE	HIGH	36	STRAIGHT	RIGHT
F1	FEMALE	LOW	37	LEFT	NA
F1	FEMALE	HIGH	38	LEFT	RIGHT
F1	FEMALE	HIGH	39	LEFT	NA
F1	FEMALE	LOW	40	LEFT	NA
F1	FEMALE	LOW	41	LEFT	NA
F1	FEMALE	HIGH	42	LEFT	RIGHT
F1	FEMALE	HIGH	43	STRAIGHT	RIGHT
F1	FEMALE	LOW	44	LEFT	NA
F1	FEMALE	LOW	45	RIGHT	RIGHT
F1	FEMALE	HIGH	46	LEFT	NA
F1	FEMALE	LOW	47	RIGHT	NA
F1	FEMALE	LOW	48	LEFT	NA
F1	FEMALE	LOW	49	LEFT	LEFT
F1	FEMALE	LOW	50	LEFT	RIGHT
F2	FEMALE	LOW	1	RIGHT	NA
F2	FEMALE	HIGH	2	STRAIGHT	NA
F2	FEMALE	HIGH	3	RIGHT	RIGHT
F2	FEMALE	LOW	4	RIGHT	RIGHT
F2	FEMALE	HIGH	5	RIGHT	NA
F2	FEMALE	HIGH	6	STRAIGHT	LEFT
F2	FEMALE	LOW	7	RIGHT	NA
F2	FEMALE	LOW	8	RIGHT	NA
F2	FEMALE	HIGH	9	LEFT	NA
F2	FEMALE	HIGH	10	LEFT	NA
F2	FEMALE	LOW	11	LEFT	NA
F2	FEMALE	HIGH	12	LEFT	NA
F2	FEMALE	LOW	13	LEFT	NA
F2	FEMALE	LOW	14	LEFT	NA
F2	FEMALE	LOW	15	LEFT	NA
F2	FEMALE	HIGH	16	RIGHT	RIGHT
F2	FEMALE	LOW	17	LEFT	RIGHT
F2	FEMALE	LOW	18	LEFT	RIGHT
F2	FEMALE	HIGH	19	LEFT	LEFT
F2	FEMALE	LOW	20	STRAIGHT	NA
F2	FEMALE	HIGH	21	LEFT	RIGHT
F2	FEMALE	LOW	22	RIGHT	RIGHT
F2	FEMALE	LOW	23	LEFT	RIGHT
F2	FEMALE	HIGH	24	LEFT	NA
F2	FEMALE	HIGH	25	LEFT	RIGHT
F2	FEMALE	LOW	26	LEFT	LEFT
F2	FEMALE	LOW	27	STRAIGHT	RIGHT
F2	FEMALE	HIGH	28	LEFT	LEFT
F2	FEMALE	LOW	29	LEFT	NA
F2	FEMALE	HIGH	30	LEFT	NA
F2	FEMALE	HIGH	31	LEFT	NA
F2	FEMALE	LOW	32	LEFT	NA
F2	FEMALE	HIGH	33	STRAIGHT	LEFT
F2	FEMALE	LOW	34	LEFT	LEFT
F2	FEMALE	LOW	35	RIGHT	NA
F2	FEMALE	HIGH	36	LEFT	LEFT
F2	FEMALE	LOW	37	RIGHT	NA
F2	FEMALE	HIGH	38	LEFT	NA
F2	FEMALE	LOW	39	LEFT	NA
F2	FEMALE	HIGH	40	LEFT	NA
F2	FEMALE	HIGH	41	LEFT	NA
F2	FEMALE	LOW	42	STRAIGHT	NA
F2	FEMALE	HIGH	43	LEFT	LEFT
F2	FEMALE	LOW	44	LEFT	NA
F2	FEMALE	LOW	45	STRAIGHT	NA
F2	FEMALE	HIGH	46	LEFT	LEFT
F2	FEMALE	LOW	47	LEFT	NA
F2	FEMALE	HIGH	48	LEFT	RIGHT
F2	FEMALE	HIGH	49	LEFT	NA
F2	FEMALE	HIGH	50	LEFT	NA
F3	FEMALE	HIGH	1	LEFT	LEFT
F3	FEMALE	LOW	2	LEFT	LEFT
F3	FEMALE	HIGH	3	LEFT	LEFT
F3	FEMALE	HIGH	4	LEFT	LEFT
F3	FEMALE	LOW	5	LEFT	NA
F3	FEMALE	LOW	6	LEFT	LEFT
F3	FEMALE	HIGH	7	RIGHT	LEFT
F3	FEMALE	HIGH	8	RIGHT	NA
F3	FEMALE	LOW	9	LEFT	RIGHT
F3	FEMALE	LOW	10	LEFT	NA
F3	FEMALE	HIGH	11	LEFT	NA
F3	FEMALE	HIGH	12	LEFT	RIGHT
F3	FEMALE	LOW	13	LEFT	RIGHT
F3	FEMALE	HIGH	14	LEFT	RIGHT
F3	FEMALE	LOW	15	LEFT	NA
F3	FEMALE	LOW	16	STRAIGHT	NA
F3	FEMALE	LOW	17	RIGHT	NA
F3	FEMALE	HIGH	18	LEFT	LEFT
F3	FEMALE	HIGH	19	LEFT	NA
F3	FEMALE	LOW	20	LEFT	NA
F3	FEMALE	LOW	21	RIGHT	LEFT
F3	FEMALE	HIGH	22	LEFT	NA
F3	FEMALE	HIGH	23	LEFT	NA
F3	FEMALE	LOW	24	LEFT	LEFT
F3	FEMALE	LOW	25	LEFT	NA
F3	FEMALE	HIGH	26	LEFT	NA
F3	FEMALE	HIGH	27	LEFT	NA
F3	FEMALE	LOW	28	LEFT	NA
F3	FEMALE	LOW	29	LEFT	NA
F3	FEMALE	HIGH	30	LEFT	LEFT
F3	FEMALE	LOW	31	LEFT	NA
F3	FEMALE	HIGH	32	LEFT	NA
F3	FEMALE	LOW	33	LEFT	NA
F3	FEMALE	HIGH	34	LEFT	NA
F3	FEMALE	LOW	35	LEFT	NA
F3	FEMALE	HIGH	36	LEFT	NA
F3	FEMALE	HIGH	37	LEFT	RIGHT
F3	FEMALE	LOW	38	RIGHT	LEFT
F3	FEMALE	HIGH	39	LEFT	NA
F3	FEMALE	LOW	40	LEFT	NA
F3	FEMALE	HIGH	41	LEFT	NA
F3	FEMALE	LOW	42	LEFT	LEFT
F3	FEMALE	LOW	43	RIGHT	RIGHT
F3	FEMALE	HIGH	44	RIGHT	NA
F3	FEMALE	LOW	45	LEFT	NA
F3	FEMALE	HIGH	46	LEFT	NA
F3	FEMALE	HIGH	47	LEFT	LEFT
F3	FEMALE	LOW	48	LEFT	RIGHT
F3	FEMALE	HIGH	49	LEFT	NA
F3	FEMALE	LOW	50	LEFT	NA
F4	FEMALE	LOW	1	RIGHT	RIGHT
F4	FEMALE	HIGH	2	RIGHT	LEFT
F4	FEMALE	LOW	3	RIGHT	NA
F4	FEMALE	LOW	4	RIGHT	RIGHT
F4	FEMALE	HIGH	5	STRAIGHT	LEFT
F4	FEMALE	HIGH	6	STRAIGHT	NA
F4	FEMALE	LOW	7	RIGHT	RIGHT
F4	FEMALE	LOW	8	LEFT	NA
F4	FEMALE	HIGH	9	RIGHT	RIGHT
F4	FEMALE	HIGH	10	RIGHT	RIGHT
F4	FEMALE	LOW	11	LEFT	NA
F4	FEMALE	LOW	12	LEFT	NA
F4	FEMALE	HIGH	13	STRAIGHT	NA
F4	FEMALE	LOW	14	LEFT	RIGHT
F4	FEMALE	LOW	15	RIGHT	RIGHT
F4	FEMALE	HIGH	16	LEFT	NA
F4	FEMALE	HIGH	17	LEFT	NA
F4	FEMALE	LOW	18	LEFT	NA
F4	FEMALE	LOW	19	RIGHT	NA
F4	FEMALE	HIGH	20	RIGHT	NA
F4	FEMALE	HIGH	21	LEFT	NA
F4	FEMALE	LOW	22	LEFT	NA
F4	FEMALE	LOW	23	LEFT	NA
F4	FEMALE	HIGH	24	LEFT	NA
F4	FEMALE	HIGH	25	LEFT	LEFT
F4	FEMALE	LOW	26	LEFT	NA
F4	FEMALE	LOW	27	RIGHT	RIGHT
F4	FEMALE	HIGH	28	LEFT	NA
F4	FEMALE	HIGH	29	LEFT	NA
F4	FEMALE	LOW	30	RIGHT	NA
F4	FEMALE	LOW	31	LEFT	NA
F4	FEMALE	HIGH	32	LEFT	RIGHT
F4	FEMALE	HIGH	33	RIGHT	NA
F4	FEMALE	LOW	34	RIGHT	NA
F4	FEMALE	LOW	35	STRAIGHT	NA
F4	FEMALE	HIGH	36	LEFT	NA
F4	FEMALE	LOW	37	RIGHT	RIGHT
F4	FEMALE	HIGH	38	LEFT	NA
F4	FEMALE	LOW	39	LEFT	NA
F4	FEMALE	HIGH	40	LEFT	NA
F4	FEMALE	LOW	41	LEFT	NA
F4	FEMALE	HIGH	42	LEFT	NA
F4	FEMALE	LOW	43	LEFT	NA
F4	FEMALE	HIGH	44	STRAIGHT	RIGHT
F4	FEMALE	LOW	45	LEFT	NA
F4	FEMALE	LOW	46	LEFT	NA
F4	FEMALE	HIGH	47	LEFT	LEFT
F4	FEMALE	HIGH	48	LEFT	NA
F4	FEMALE	HIGH	49	RIGHT	NA
F4	FEMALE	HIGH	50	STRAIGHT	RIGHT
F5	FEMALE	HIGH	1	RIGHT	RIGHT
F5	FEMALE	LOW	2	LEFT	LEFT
F5	FEMALE	HIGH	3	RIGHT	RIGHT
F5	FEMALE	HIGH	4	LEFT	LEFT
F5	FEMALE	LOW	5	LEFT	LEFT
F5	FEMALE	LOW	6	RIGHT	RIGHT
F5	FEMALE	HIGH	7	RIGHT	RIGHT
F5	FEMALE	HIGH	8	LEFT	LEFT
F5	FEMALE	LOW	9	STRAIGHT	LEFT
F5	FEMALE	HIGH	10	RIGHT	NA
F5	FEMALE	LOW	11	LEFT	LEFT
F5	FEMALE	HIGH	12	LEFT	RIGHT
F5	FEMALE	LOW	13	LEFT	NA
F5	FEMALE	HIGH	14	RIGHT	NA
F5	FEMALE	HIGH	15	RIGHT	RIGHT
F5	FEMALE	LOW	16	LEFT	NA
F5	FEMALE	HIGH	17	LEFT	NA
F5	FEMALE	LOW	18	STRAIGHT	NA
F5	FEMALE	HIGH	19	LEFT	NA
F5	FEMALE	HIGH	20	LEFT	RIGHT
F5	FEMALE	LOW	21	RIGHT	NA
F5	FEMALE	HIGH	22	RIGHT	NA
F5	FEMALE	LOW	23	RIGHT	NA
F5	FEMALE	LOW	24	LEFT	NA
F5	FEMALE	HIGH	25	LEFT	NA
F5	FEMALE	LOW	26	RIGHT	RIGHT
F5	FEMALE	LOW	27	STRAIGHT	NA
F5	FEMALE	HIGH	28	LEFT	RIGHT
F5	FEMALE	LOW	29	STRAIGHT	RIGHT
F5	FEMALE	HIGH	30	RIGHT	RIGHT
F5	FEMALE	LOW	31	LEFT	NA
F5	FEMALE	HIGH	32	LEFT	RIGHT
F5	FEMALE	LOW	33	RIGHT	NA
F5	FEMALE	HIGH	34	RIGHT	NA
F5	FEMALE	LOW	35	LEFT	NA
F5	FEMALE	HIGH	36	LEFT	NA
F5	FEMALE	HIGH	37	RIGHT	RIGHT
F5	FEMALE	LOW	38	RIGHT	NA
F5	FEMALE	LOW	39	LEFT	NA
F5	FEMALE	HIGH	40	RIGHT	NA
F5	FEMALE	HIGH	41	LEFT	NA
F5	FEMALE	LOW	42	LEFT	RIGHT
F5	FEMALE	LOW	43	LEFT	LEFT
F5	FEMALE	HIGH	44	LEFT	NA
F5	FEMALE	HIGH	45	LEFT	NA
F5	FEMALE	LOW	46	STRAIGHT	NA
F5	FEMALE	LOW	47	LEFT	LEFT
F5	FEMALE	HIGH	48	STRAIGHT	LEFT
F5	FEMALE	LOW	49	LEFT	NA
F5	FEMALE	LOW	50	RIGHT	NA
F6	FEMALE	HIGH	1	LEFT	RIGHT
F6	FEMALE	LOW	2	LEFT	LEFT
F6	FEMALE	LOW	3	RIGHT	LEFT
F6	FEMALE	HIGH	4	STRAIGHT	LEFT
F6	FEMALE	HIGH	5	LEFT	LEFT
F6	FEMALE	LOW	6	LEFT	LEFT
F6	FEMALE	LOW	7	RIGHT	RIGHT
F6	FEMALE	HIGH	8	LEFT	RIGHT
F6	FEMALE	HIGH	9	LEFT	NA
F6	FEMALE	LOW	10	LEFT	RIGHT
F6	FEMALE	LOW	11	LEFT	NA
F6	FEMALE	HIGH	12	RIGHT	RIGHT
F6	FEMALE	HIGH	13	LEFT	NA
F6	FEMALE	LOW	14	RIGHT	NA
F6	FEMALE	LOW	15	RIGHT	NA
F6	FEMALE	HIGH	16	LEFT	LEFT
F6	FEMALE	HIGH	17	STRAIGHT	NA
F6	FEMALE	LOW	18	LEFT	NA
F6	FEMALE	HIGH	19	RIGHT	NA
F6	FEMALE	LOW	20	RIGHT	LEFT
F6	FEMALE	HIGH	21	LEFT	NA
F6	FEMALE	LOW	22	RIGHT	NA
F6	FEMALE	HIGH	23	RIGHT	NA
F6	FEMALE	HIGH	24	LEFT	NA
F6	FEMALE	LOW	25	RIGHT	RIGHT
F6	FEMALE	LOW	26	LEFT	NA
F6	FEMALE	HIGH	27	LEFT	NA
F6	FEMALE	LOW	28	STRAIGHT	NA
F6	FEMALE	HIGH	29	LEFT	NA
F6	FEMALE	LOW	30	STRAIGHT	NA
F6	FEMALE	LOW	31	RIGHT	NA
F6	FEMALE	HIGH	32	RIGHT	NA
F6	FEMALE	LOW	33	LEFT	LEFT
F6	FEMALE	HIGH	34	RIGHT	RIGHT
F6	FEMALE	LOW	35	RIGHT	NA
F6	FEMALE	HIGH	36	LEFT	NA
F6	FEMALE	HIGH	37	LEFT	NA
F6	FEMALE	LOW	38	RIGHT	NA
F6	FEMALE	HIGH	39	STRAIGHT	NA
F6	FEMALE	LOW	40	LEFT	NA
F6	FEMALE	HIGH	41	LEFT	NA
F6	FEMALE	LOW	42	LEFT	NA
F6	FEMALE	LOW	43	RIGHT	NA
F6	FEMALE	HIGH	44	RIGHT	LEFT
F6	FEMALE	LOW	45	LEFT	NA
F6	FEMALE	LOW	46	RIGHT	NA
F6	FEMALE	HIGH	47	LEFT	NA
F6	FEMALE	HIGH	48	RIGHT	NA
F6	FEMALE	LOW	49	STRAIGHT	NA
F6	FEMALE	HIGH	50	RIGHT	NA
F7	FEMALE	HIGH	1	RIGHT	NA
F7	FEMALE	HIGH	2	LEFT	LEFT
F7	FEMALE	LOW	3	LEFT	NA
F7	FEMALE	LOW	4	RIGHT	NA
F7	FEMALE	HIGH	5	RIGHT	NA
F7	FEMALE	HIGH	6	STRAIGHT	LEFT
F7	FEMALE	LOW	7	LEFT	LEFT
F7	FEMALE	LOW	8	STRAIGHT	NA
F7	FEMALE	HIGH	9	STRAIGHT	NA
F7	FEMALE	HIGH	10	LEFT	NA
F7	FEMALE	LOW	11	LEFT	NA
F7	FEMALE	LOW	12	LEFT	NA
F7	FEMALE	HIGH	13	LEFT	LEFT
F7	FEMALE	LOW	14	LEFT	RIGHT
F7	FEMALE	HIGH	15	LEFT	LEFT
F7	FEMALE	LOW	16	LEFT	LEFT
F7	FEMALE	LOW	17	LEFT	LEFT
F7	FEMALE	HIGH	18	LEFT	NA
F7	FEMALE	HIGH	19	LEFT	LEFT
F7	FEMALE	LOW	20	LEFT	RIGHT
F7	FEMALE	LOW	21	STRAIGHT	NA
F7	FEMALE	HIGH	22	LEFT	NA
F7	FEMALE	HIGH	23	LEFT	RIGHT
F7	FEMALE	LOW	24	LEFT	RIGHT
F7	FEMALE	LOW	25	LEFT	LEFT
F7	FEMALE	HIGH	26	LEFT	LEFT
F7	FEMALE	HIGH	27	STRAIGHT	RIGHT
F7	FEMALE	LOW	28	LEFT	NA
F7	FEMALE	LOW	29	RIGHT	NA
F7	FEMALE	HIGH	30	LEFT	NA
F7	FEMALE	HIGH	31	RIGHT	RIGHT
F7	FEMALE	LOW	32	RIGHT	NA
F7	FEMALE	LOW	33	LEFT	NA
F7	FEMALE	HIGH	34	STRAIGHT	LEFT
F7	FEMALE	LOW	35	LEFT	NA
F7	FEMALE	HIGH	36	STRAIGHT	NA
F7	FEMALE	LOW	37	LEFT	NA
F7	FEMALE	HIGH	38	RIGHT	NA
F7	FEMALE	HIGH	39	STRAIGHT	NA
F7	FEMALE	LOW	40	STRAIGHT	NA
F7	FEMALE	HIGH	41	LEFT	NA
F7	FEMALE	LOW	42	RIGHT	NA
F7	FEMALE	LOW	43	LEFT	NA
F7	FEMALE	HIGH	44	LEFT	LEFT
F7	FEMALE	LOW	45	RIGHT	NA
F7	FEMALE	HIGH	46	LEFT	NA
F7	FEMALE	HIGH	47	LEFT	LEFT
F7	FEMALE	LOW	48	LEFT	NA
F7	FEMALE	LOW	49	RIGHT	NA
F7	FEMALE	HIGH	50	LEFT	NA
